---

REVIEW ARTICLE

---

## Pain after laparoscopy

J. I. ALEXANDER

Laparoscopy (Greek λαπαρά—flank, or λαπαροσ—soft; σκοπην—to look) involves insufflation of the abdomen by gas or other fluid so that the endoscope (usually 6–10 mm in diameter) can view the intra-abdominal contents without being in direct contact with the viscera or tissues. Surgical procedures can be carried out by instruments introduced through one or more additional ports. Laparoscopy therefore defines the surgical approach and is associated with pain which is additional to that caused by intra-abdominal trauma. Nevertheless, pain which occurs after this procedure is significantly less and shorter than that caused by the same surgical procedure made possible by laparotomy.<sup>7 45 50 65 90</sup> The total costs of the procedure are less<sup>32</sup> and the long-term morbidity is less than when performed by laparotomy.<sup>88</sup> The reduction in both pain and loss of function has made possible earlier discharge from hospital,<sup>64</sup> provided that control of residual pain is not by drugs which also prevent discharge because of nausea, ileus or reduction of consciousness and autonomous function.<sup>70 99</sup> Early discharge also reduces the safety of powerful analgesics and makes difficult monitoring and adequate treatment of pain after laparoscopy.

### Timing and pattern of pain after laparoscopy

Pain may occur in the upper abdomen, lower abdomen, back or shoulders. It may be transient or persist for at least 3 days.<sup>26 79</sup> Shoulder pain may occur in as many as 63%<sup>78</sup> or as few as 35% of patients.<sup>26</sup> The incidence is not altered if suxamethonium is used to facilitate tracheal intubation.<sup>98</sup> The greatest incidence of pain is in the upper abdomen.<sup>26</sup> Reporting of pain (at any site) is greatest after operation, decreases to a low level within 24 h, but increases to a second or even a third peak later.<sup>2 4 26</sup> Joris and colleagues<sup>46</sup> reported that after laparoscopic cholecystectomy, visceral pain predominates in the first 24 h but subsides from a peak soon after operation, whereas shoulder pain, minor

on the first day, increases and becomes significant on the following day.

### Mechanism of pain after laparoscopy

This has been reviewed by Schoeffler, Diemunsch and Fourgeaud.<sup>81</sup> Rapid distension of the peritoneum may be associated with tearing of blood vessels, traumatic traction of the nerves and release of inflammatory mediators. The prolonged presence of shoulder tip pain<sup>26 45 78</sup> suggests excitation of the phrenic nerve. This pain is present often after laparotomy<sup>65</sup> and both laparotomy and laparoscopy are associated with persistent pneumoperitoneum, sometimes for 3 days. There is a statistically significant correlation between the width of the gas bubble and pain score,<sup>42</sup> and this pain can be reduced by aspiration of the gas under the diaphragm,<sup>78</sup> by “active aspiration”, that is repeated suction and manipulation,<sup>30</sup> by the use of a gas drain<sup>2</sup> or by application of local anaesthesia under the diaphragm under direct vision<sup>71 73</sup> or through a sub-phrenic catheter.<sup>34</sup> Peritoneal inflammation or the presence of gas is probably also the origin of the upper abdominal pain after lower abdominal surgery or after diagnostic laparoscopy. This also can persist for at least 3 days.<sup>26</sup> The use of nitrous oxide instead of carbon dioxide for peritoneal insufflation may not be responsible for the intra-abdominal explosions reported,<sup>41</sup> but it alters insignificantly the incidence and severity of postoperative pain or nausea and vomiting.<sup>43 55</sup> Comyn<sup>18</sup> reported that peritoneal biopsy performed 2–3 days after laparoscopy showed peritoneal inflammation and neuronal rupture, and there was a linear inverse relationship between abdominal compliance at the time of laparoscopy and severity of postoperative pain. Suxamethonium may be used to facilitate intubation and its use can be associated with pain across the shoulders, but its avoidance is not associated with a reduction of pain in the shoulders.<sup>98</sup>

### PAIN AFTER LAPAROSCOPIC STERILIZATION

Laparoscopic sterilization is probably the most common operation by laparoscopy in the UK. It is more painful than diagnostic laparoscopy.<sup>29 39</sup> Davis and Millar<sup>23</sup> showed that laparoscopic sterilization pain was worse than that after diagnostic

---

(*Br. J. Anaesth.* 1997; 79: 369–378).

#### Key words

Pain, postoperative. Surgery, laparoscopy. Analgesics anti-inflammatory, steroid. Non-steroidal anti-inflammatory drugs.

---

J. I. ALEXANDER, MB, BS, FRCA, Sir Humphry Davy Department of Anaesthesia, Bristol Royal Infirmary, Bristol BS2 8HW.

laparoscopy for the first 4 h after operation but was not significantly greater after hospital discharge on the same day as surgery. Analgesia tends to be given more readily during studies of pain or analgesics than at other times so that the incidence of pain after laparoscopic tubal occlusion is difficult to judge from published studies. In some placebo-controlled studies of postoperative analgesics, some of the patients in the control groups did not receive additional analgesia (see Larsen and Jensen<sup>52</sup>). Nearly all, however, had received some form of intraoperative analgesia.

The three methods of tubal ligation commonly used are diathermy, ring or loop occlusion and clips (e.g. Hulka or Filshie). There is considerable difference in the amount of lower abdominal pain between the methods. Chi and Cole<sup>14</sup> found more pain both during the procedure (under local anaesthesia) and after operation when rings were used than when spring-loaded clips were used. Dobbs and colleagues<sup>26</sup> found that the incidence and severity of lower abdominal pain were significantly higher after ring sterilization than after Hulka clip sterilization and that the pain after clip sterilization did not differ significantly from that after diagnostic laparoscopy. The greatest difference was in lower abdominal pain in the first 6 h after operation. Huang and colleagues<sup>40</sup> found that, under local anaesthesia, tubal diathermy caused more pain than Falope rings but that after 4 h the pain after rings exceeded that of diathermy. Lawson, Cole and Templeton<sup>53</sup> (and Leggat and Barr<sup>54</sup> retrospectively) found that Falope rings were associated with administration of more analgesics than electrocoagulation (diathermy). Comfort and colleagues<sup>17</sup> found that the pain of clips exceeded that after diathermy and others also noted the similarity in character and distribution of colicky pain at and after sterilization with that of dysmenorrhoea.<sup>40</sup>

## Pain relief

### LOCAL ANAESTHESIA

Pain after diagnostic laparoscopy can be reduced significantly by a bilateral rectus sheath block, performed above the umbilicus with approximately 15 ml of 0.25% bupivacaine on each side.<sup>86</sup>

The pain that follows tubal ligation can be lessened by application of local anaesthetic directly to the fallopian tube or by injection into the mesosalpinx<sup>172 85</sup> at operation. This has been shown to have an effect after rings or bands, but also after fulguration or even when applied at the same time, as a gel, as the Filshie clip.<sup>6 48 60 62 75</sup> McKenzie and colleagues<sup>61</sup> reported that 1% etidocaine, when applied to the fallopian tubes from the uterus to the fimbriae, was superior to 0.75% bupivacaine. Its use led to reduced postoperative use of morphine and fewer admissions to hospital overnight.

The total pain of laparoscopy can be reduced by application of local anaesthesia under the diaphragm under direct vision,<sup>73</sup> through an irrigation device<sup>38</sup> or through a sub-phrenic catheter.<sup>34</sup> Shoulder pain after pelvic peritonoscopy can be reduced by either

lignocaine or bupivacaine i.p.,<sup>57</sup> and the addition of adrenaline<sup>71</sup> permitted a large volume to be used without approaching systemic toxicity.<sup>87</sup> Conversely, local anaesthetics administered i.p. seem to be ineffective for either visceral or shoulder pain after laparoscopic cholecystectomy<sup>46 77 80</sup> but these studies did not document a head-down tilt to bathe the tissues supplied by the phrenic nerve. However, Schulte-Steinberg and colleagues<sup>82</sup> found that a single injection of interpleural 0.25% bupivacaine 30 ml, but not interpleural morphine 1.5 mg, morphine 1.0 mg i.p. or 0.25% bupivacaine 20 ml i.p., significantly reduced the global pain after laparoscopic cholecystectomy for 6 h in a randomized, double-blind, saline-controlled study of 110 patients. The intraperitoneal drugs were sprayed under pressure over the gallbladder bed and the diaphragmatic surface of the liver. This did not greatly affect the pain perceived in the shoulders. Of patients who received a peritoneal injection, seven of 50 complained of shoulder pain at 6 h, and 24 complained at 24 h. Of those who received interpleural injections, seven of 60 reported shoulder pain at 6 h, and 23 at 24 h. Those reporting shoulder pain were distributed evenly between the treatment and control groups. However, Chundrigar and colleagues,<sup>15</sup> using 20 ml of 0.25% bupivacaine directly onto the gallbladder bed, reported significant pain relief.

Pelvic laparoscopy can be performed under spinal anaesthesia alone, either intrathecally<sup>84</sup> or extradurally,<sup>31</sup> and, in an uncontrolled cohort, caudal extradural anaesthesia provided effective pain relief in children after laparoscopic transperitoneal herniorrhaphy.<sup>91</sup>

### NON-STEROIDAL ANTI-INFLAMMATORY DRUGS

The amount of pelvic pain after tubal manipulation or tubal ligation may be related to concentrations of prostaglandins. Prostaglandin concentrations are known to increase with dysmenorrhoea. Prostaglandin PGF<sub>2α</sub> is found in the human oviduct at 10 times the concentration found in plasma. Its localization changes at the time of ovulation. PGF<sub>2α</sub> is found mainly in the isthmus and correlates with motility of this region, whereas PGE<sub>1</sub> is found in the ampulla.<sup>13 74 94</sup> The human ovarian follicle contains both PGE<sub>2</sub> and PGF<sub>2α</sub> in critical amounts. Laparoscopic tubal manipulation and ligation release prostaglandins, which may increase the frequency of nociceptive impulses and cause pain. This pain may therefore be amenable to prostaglandin synthase inhibitors. Rarely however, is lower abdominal pain assessed separately from upper abdominal, chest or shoulder pain. Even when it is, pain scores and re-medication may be used for the global pain experience.<sup>2 19 98</sup>

### EFFICACY OF NON-STEROIDAL ANTI-INFLAMMATORY DRUGS (NSAID)

The prospective, randomized, controlled comparisons of NSAID with placebo which showed that NSAID were superior to placebo in reducing pain or reducing

Table 1 Randomized controlled studies in which NSAID showed more efficacy than placebo after laparoscopy

| Reference                             | NSAID               | No. of subjects | Time of administration | Route  | Opioid given to all subjects | Procedure                                      | Pain intensity | Additional analgesic requirements | Time to first pain or analgesic assessment (h) |
|---------------------------------------|---------------------|-----------------|------------------------|--------|------------------------------|------------------------------------------------|----------------|-----------------------------------|------------------------------------------------|
| Davie and colleagues <sup>22</sup>    | Fenoprofen 200 mg   | 45              | Postop. prn            | Oral   | No                           | Not stated                                     | Reduced        | Reduced                           |                                                |
| Brodie and Casper <sup>8</sup>        | Indomethacin 100 mg | 42              | Post-induction         | Rectal | Yes                          | Sterilization with rings                       | Not stated     | Reduced                           | 0.5                                            |
| Huang and colleagues <sup>40</sup>    | Paracetamol 1300 mg | 50              | 1 h preop.             | Oral   | No                           | Sterilization with diathermy or rings under LA | Reduced        | Not stated                        | 1.5                                            |
| DeLucia and White <sup>24</sup>       | Ketorolac 30 mg     | 50              | Preop.                 | I.m.   | Yes                          | Not stated                                     | Reduced        | Reduced                           | 1                                              |
| DeLucia and White <sup>24</sup>       | Ketorolac 60 mg     | 50              | Preop.                 | I.m.   | Yes                          | Not stated                                     | Reduced        | Reduced                           | 1                                              |
| Comfort and colleagues <sup>17</sup>  | Naproxen 550 mg     | 47              | 1 h preop.             | Oral   | Yes                          | Sterilization with clips or diathermy          | Reduced        | Reduced                           | 1.5                                            |
| Gillberg and colleagues <sup>33</sup> | Diclofenac 50 mg    | 46              | 1 h preop.             | Rectal | Yes                          | Diagnostic/sterilization                       | Reduced        | Reduced                           | 0.5                                            |
| Hovorka and colleagues <sup>39</sup>  | Diclofenac 100 mg   | 99              | Post-induction         | I.v.   | Yes                          | Diagnostic                                     | Not stated     | Reduced                           | 0.5                                            |
| Liu and colleagues <sup>56</sup>      | Ketorolac 60 mg     | 60              | 10–20 min preop.       | I.v.   | Yes                          | Cholecystectomy                                | Reduced        | Reduced                           | 2                                              |
| Van Ee and colleagues <sup>93</sup>   | Naproxen 500 mg     | 58              | 1 h preop.             | Rectal | No                           | Diagnostic                                     | Reduced        | Not used                          | 1.5                                            |
| Green and colleagues <sup>37</sup>    | Ketorolac 60 mg     | 70              | 30 min pre-recovery    | I.v.   | Yes                          | Diagnostic                                     | Reduced        | Reduced                           | 0.5                                            |
| Wilson and colleagues <sup>95</sup>   | Diclofenac 75 mg    | 49              | Post-induction         | I.m.   | Yes                          | Cholecystectomy                                | Reduced        | No significant difference         |                                                |
| Dunn and colleagues <sup>28</sup>     | Naproxen 1000 mg    | 74              | 90 min preop.          | Oral   | Yes                          | Sterilization with clips                       | Similar        | Reduced                           | 2                                              |

Table 2 Randomized controlled studies in which NSAID failed to show more effect than placebo

| Reference                             | NSAID               | No. of subjects | Time of administration | Route  | Opioid added to both groups | Procedure                      | Pain intensity of NSAID group | Additional analgesic requirements | Time to pain or analgesic assessment (h) |
|---------------------------------------|---------------------|-----------------|------------------------|--------|-----------------------------|--------------------------------|-------------------------------|-----------------------------------|------------------------------------------|
| McLennan and colleagues <sup>63</sup> | Indomethacin 100 mg | 95              | 1 h preop              | Rectal | Yes                         | Sterilization with clips/rings | Less but $P > 0.05$           | Similar; $P = 0.3$                | 1.5                                      |
| Edwards and colleagues <sup>29</sup>  | Diclofenac 75 mg    | 40              | Post-induction         | I.m.   | No                          | Diagnostic                     | Less but $P > 0.05$           | Similar                           | 0.5                                      |
| Edwards and colleagues <sup>29</sup>  | Diclofenac 75 mg    | 40              | Post-induction         | I.m.   | No                          | Sterilization with clip        | Less but $P > 0.05$           | Similar                           | 0.5                                      |
| Crocker and Paech <sup>19</sup>       | Indomethacin 100 mg | 50              | 2 h preop.             | Rectal | Yes                         | Sterilization with clips       | Less but $P = 0.07$           | Less but $P = 0.07$               | 2.5                                      |
| Hovorka and colleagues <sup>39</sup>  | Diclofenac 100 mg   | 70              | Post-induction         | I.v.   | Yes                         | Sterilization                  | Not stated                    | Similar                           | 0.5                                      |
| Shapiro and Duffy <sup>83</sup>       | Ketorolac 30 mg     | 40              | Post-induction         | I.m.   | Yes                         | Sterilization with clips       | Less but $P > 0.05$           | Less but $P > 0.05$               | 0.5                                      |
| Windsor and colleagues <sup>96</sup>  | Tenoxicam 20 mg     | 67              | At induction           | I.v.   | Yes                         | Diagnostic                     | Less but $P > 0.05$           | Less but $P > 0.05$               | 0.5                                      |

the requirement for additional analgesic after laparoscopy are shown in table 1. Those which showed no significant benefit of NSAID compared with placebo are shown in table 2.

#### COMPARISON OF NSAID WITH OTHER ANALGESICS FOR THE PAIN AFTER PELVIC LAPAROSCOPY

Randomized, controlled comparisons of NSAID with other analgesics are shown in table 3. NSAID have been compared with paracetamol, codeine, oxycodone, fentanyl, morphine, pethidine, dexmedetomidine and dezocine.

Comparison with paracetamol<sup>40</sup> showed that meclofenamate was more effective in reducing the pain of tubal ligation during and after local anaesthesia, although both drugs were insufficient in most cases. However, both drugs were given 1 h before operation and peak concentrations of oral paracetamol were achieved at approximately 1 h in plasma and at 4 h in CSF,<sup>5</sup> so that maximal analgesia

would not have been achieved at the time of surgery.

Dexmedetomidine was effective in reducing the need for other analgesia but was distinguished by increased somnolence and bradycardia, such that 33% of such subjects required atropine.<sup>3</sup> Dezocine was associated with a higher incidence of nausea or vomiting (60%) than either ketorolac or fentanyl, and most of the dezocine subjects required antiemetic therapy.<sup>25</sup> In a comparison of zomepirac 100 mg with codeine 60 mg<sup>27</sup> for the pain of sterilization with diathermy or rings, there was little difference in pain intensity or additional opioid requirements. Zomepirac has since been withdrawn because of the incidence of NSAID-related side effects. Ketorolac 30 mg i.m. has been compared with pethidine 100 mg i.m. after induction of anaesthesia.<sup>11</sup> Duration of operation was not stated, but at 30 min after operation those who had received pethidine had only marginally less pain, at 1 h there was no difference, and at 4 h after operation the

Table 3 Randomised controlled comparisons of effects of NSAID and other analgesics on pain after laparoscopy

| Reference                              | NSAID                              | No. of subjects | Time of administration | Route | Opioid given to all subjects | Procedure                          | Comparator                              | Pain intensity      | Additional opioid requirements |
|----------------------------------------|------------------------------------|-----------------|------------------------|-------|------------------------------|------------------------------------|-----------------------------------------|---------------------|--------------------------------|
| Davie and colleagues <sup>22</sup>     | Fenoprofen 200 mg                  | 43              | Postop. when required  | Oral  | No                           | Not stated                         | Morphine 8 mg i.m.                      | Increased           | Similar                        |
| Dunn and colleagues <sup>27</sup>      | Zomepirac 100 mg                   | 48              | 30 min preop.          | Oral  | No                           | Sterilization with diathermy/rings | Codeine 60 mg orally                    | Similar             | Similar                        |
| Huang and colleagues <sup>40</sup>     | Meclofenamate 100 mg               | 50              | 1 h preop.             | Oral  | No                           | Sterilization with diathermy/rings | Paracetamol 1300 mg orally              | Reduced             | Not stated                     |
| Huang and colleagues <sup>40</sup>     | Meclofenamate 200 mg               | 50              | 1 h preop.             | Oral  | No                           | Sterilization with diathermy/rings | Meclofenamate 100 mg                    | Similar             | Not stated                     |
| Rosenblum and colleagues <sup>79</sup> | Ibuprofen 800 mg                   | 30              | 1 h preop.             | Oral  | No                           | Diagnostic laparoscopy             | Fentanyl 75 µg                          | Similar             | Similar                        |
| Aho and colleagues <sup>3</sup>        | Diclofenac 250 µg kg <sup>-1</sup> | 48              | Postop. when required  | I.v.  | No                           | Sterilization with clips           | Oxycodone 60 µg kg <sup>-1</sup> i.v.   | Increased           | Increased                      |
| Aho and colleagues <sup>3</sup>        | Diclofenac 250 µg kg <sup>-1</sup> | 48              | Postop. when required  | I.v.  | No                           | Sterilization with clips           | Dexmedetomidine 0.4 µg kg <sup>-1</sup> | Increased           | Increased                      |
| Grace and colleagues <sup>35</sup>     | Diclofenac 75 mg                   | 80              | Pre-induction          | I.m.  | No                           | Sterilization with rings           | Fentanyl 100 µg                         | Increased/decreased | See text                       |
| Ding and White <sup>25</sup>           | Ketorolac 60 mg                    | 88              | Pre-induction          | I.v.  | Yes                          | Not stated                         | Fentanyl 100 µg                         | Reduced             | Reduced                        |
| Ding and White <sup>25</sup>           | Ketorolac 60 mg                    | 92              | Pre-induction          | I.v.  | Yes                          | Not stated                         | Dezocine 6 mg                           | Similar             | Similar                        |
| Cade and Kakulas <sup>11</sup>         | Ketorolac 30 mg                    | 60              | Post-induction         | I.m.  | Yes                          | Sterilization                      | Pethidine 100 mg                        | Reduced             | Reduced                        |
| Lysak and colleagues <sup>58</sup>     | Ketorolac 60 mg                    | 56              | 30 min                 | I.m.  | Yes                          | Not stated                         | Fentanyl 100 µg                         | Reduced             | Similar                        |
| Lysak and colleagues <sup>58</sup>     | Piroxicam 40 mg                    | 55              | 90 min preop.          | Oral  | Yes                          | Not stated                         | Fentanyl 100 µg                         | Reduced             | Similar                        |

ketorolac group had significantly less pain than the pethidine group.

Both of these groups were given fentanyl during operation and this technique was used in a large minority of the comparisons.<sup>11 25 35 58</sup> When fentanyl was given during operation, either as a single bolus or as cardiovascular changes indicated, and sufficient time elapsed before assessment of analgesia, ketorolac<sup>25 58</sup> reduced postoperative pain more than fentanyl alone. When NSAID were the sole analgesics for sterilization, they were less effective than morphine<sup>22</sup> or oxycodone.<sup>3</sup> For diagnostic laparoscopy without sterilization, ibuprofen and fentanyl were equally effective.<sup>79</sup> In a double-blind, double-dummy study of 80 patients undergoing sterilization with Falope rings, diclofenac i.m. was compared with fentanyl i.v.<sup>35</sup> At approximately 40 min after administration of diclofenac and 30 min after fentanyl, less pain was associated with fentanyl. However, 30 min later, in those requesting additional analgesia, the fentanyl group reported more pain. Perhaps more significantly, most pain scores in the first 2 h after operation were unsatisfactorily high (authors' own comment) and the scores of those who requested additional analgesia were not always higher than those who did not. The time to the first analgesic, when given, was also similar in both groups.

These results suggest that NSAID in usual therapeutic doses are more effective than paracetamol. They also suggest that analgesia associated with NSAID was broadly similar to that of short-acting opioids such as pethidine or fentanyl provided that the assessment is made around the peak action of the NSAID or at the end of the duration of action of the opioid. The combination of an NSAID and a short-acting opioid is more

effective in intensity and duration than the short-acting opioid alone. However, comparisons of diclofenac with oxycodone and fenoprofen with morphine showed that the longer-acting opioid was clinically significantly more effective.

#### NSAID AND POST-LAPAROSCOPIC CHOLECYSTECTOMY PAIN

Wilson and colleagues<sup>95</sup> investigated diclofenac 75 mg i.m. at induction of anaesthesia compared with placebo. Intraoperative fentanyl 3 µg kg<sup>-1</sup>, with supplements as required, was used in all patients. A second dose of the drug was given after 12 h and morphine was given as required. Pain was scored on a visual analogue scale at 4, 24 and 48 h after operation. In the diclofenac group, pain was significantly less at 4 h and there was a lower consumption of morphine (ns).

Liu and colleagues<sup>56</sup> gave ketorolac 30 mg, 15 min before induction, another 30 mg after intubation and 60 mg 4 h after operation, and compared ventilatory, recovery and analgesic effects with saline. Duration of anaesthesia was approximately 2 h. Significantly lower pain scores were recorded in the ketorolac group. One-third of the ketorolac group and two-thirds of the saline group required additional post-operative analgesia. There was no significant difference in anxiety, sedation or nausea between the two groups. There was also no difference in the severity of ventilatory dysfunction.

The undisputed success of NSAID in this operation relative to pelvic laparoscopy may be because the pain was relatively more dependent on inflammatory mediators, because the operation was longer and more intraoperative analgesics were given, or because there was a longer time from administration to assessment of the NSAID.

## FAILURE OF NSAID TO PROVIDE MORE PAIN RELIEF THAN PLACEBO

There appears to be wide variation in efficacy of NSAID on pain after laparoscopy. Some randomized, double-blind, controlled studies showed insignificant effects, although none suggested that NSAID were less effective than placebo. This lack of efficacy is contrary to the numerous studies which demonstrate a convincing analgesic effect or opioid-sparing effect of NSAID for the pain of more invasive surgery<sup>12 20 69 92</sup> in which pain scores were used and opioid use was measured by patient-controlled analgesic administration.

MacLennan and colleagues<sup>63</sup> showed that there is an insignificant reduction in the numbers of patients requiring pethidine, and in the amount of pethidine given, in those who received an indomethacin suppository 1 h before operation compared with those who had a dummy suppository. Almost 100 patients took part, but the method of determining the analgesic efficacy may not have been sensitive enough. The recovery room nurses, who were unaware of the preoperative medication, gave either pethidine or a combination of paracetamol and codeine for postoperative pain at their discretion and at apparently different doses. Only pethidine consumption was recorded and pain was not scored. The method was unable to detect a difference in pain levels caused by clip or ring sterilization.

Edwards and colleagues<sup>29</sup> also demonstrated a lower pain score after laparoscopic sterilization at 20 min and 1 h and 20 min after diclofenac i.m. (compared with no injection) and, although the median of one pain score was more than 3 SEM less than the other, the difference between the two groups of 20 patients was not significant.

Significantly reduced opioid requirements after diclofenac 75 mg for diagnostic laparoscopy but not

for laparoscopic sterilization have been reported,<sup>39</sup> although even in the latter procedure, the diclofenac group required slightly less fentanyl and paracetamol after operation. Perhaps a lack of difference or lack of sensitivity can be found in the method of pain titration and in the timing of assessment. Pain was not scored. Analgesics in large aliquots (fentanyl 50 µg i.v. or paracetamol 0.5 g rectally) were given "according to clinical judgement". Observer scores of pain were usually less than those of the patient and there would be reluctance to use additional large doses for small increases in pain. Diclofenac was given after induction of anaesthesia and approximately 27 min before the end of anaesthesia, possibly 30 min before the first assessment of pain and analgesic requirements. However, Green and colleagues were also able to detect a differential benefit for NSAID after diagnostic laparoscopy<sup>37</sup> but not after laparoscopic sterilization.<sup>36</sup>

Prados and Blaylock<sup>76</sup> found no benefit of ketorolac 30 or 60 mg given 15–20 min before the end of surgery, as tested by the use of patient administered and controlled fentanyl. Ketorolac was given i.m. and titration of analgesic to pain in the recovery room might be expected to be achieved without the influence of ketorolac but the amount of analgesic self-administered during admission was only marginally reduced in the ketorolac 60 mg group and not in the ketorolac 30 mg group.

Windsor and co-workers<sup>96</sup> found a non-significant improvement in pain score and a reduction in the number of rescue doses of fentanyl after tenoxicam i.v. at induction of anaesthesia. Pain and pain rescue were measured over 24 h. Tenoxicam is slow in analgesic onset and the peak action may be too late to treat pain susceptible to NSAID.

Although the provision of pain relief in the recovery period is variable and the efficacy of analgesics is dependent on patient expression of

Table 4 Assessment of pain and analgesic requirement in randomized controlled comparisons of NSAID and placebo

| Reference                             | Significant effect of NSAID found | Assessment of pain                                          | Assessment of additional analgesic requirement                             |
|---------------------------------------|-----------------------------------|-------------------------------------------------------------|----------------------------------------------------------------------------|
| McLennan and colleagues <sup>63</sup> | No                                | Not stated                                                  | Amount and type given on discretion of staff                               |
| Edwards and colleagues <sup>29</sup>  | No                                | Visual analogue scale (VAS)                                 | Paracetamol, co-proxamol or pethidine given by nurse on request by patient |
| Edwards and colleagues <sup>29</sup>  | No                                | Visual analogue scale (VAS)                                 | Paracetamol, co-proxamol or pethidine given by nurse on request by patient |
| Crocker and Paech <sup>19</sup>       | No                                | VAS at 0.5, 1 and 3 h                                       | Pethidine 25 mg doses i.v. titrated to patient comfort                     |
| Hovorka and colleagues <sup>39</sup>  | No                                | Three-point rating scale assessment by observer             | Paracetamol or fentanyl given on observer's judgement of pain              |
| Shapiro and Duffy <sup>83</sup>       | No                                | VAS at 1 and 5 h, peak VAS                                  | Standard protocol: amount recorded                                         |
| Windsor and colleagues <sup>96</sup>  | No                                | Linear analogue scale and verbal rating scale               | Patient request to nurses and pain diary                                   |
| Davie and colleagues <sup>22</sup>    | Yes                               | Linear analogue scale (LAS) + interview                     | Patient demand when tolerance exceeded                                     |
| Brodie and Casper <sup>8</sup>        | Yes                               | Nurse's judgement of analgesic need                         | Standard protocol of variable analgesia (not double-blind)                 |
| Huang and colleagues <sup>40</sup>    | Yes                               | 1–5 verbal rating scale                                     | Morphine, meclofenate or paracetamol                                       |
| Delucia and White <sup>24</sup>       | Yes                               | 0–100 las (averaged)                                        | Fentanyl or ketorolac used as rescue analgesia                             |
| Delucia and White <sup>24</sup>       | Yes                               | 0–100 las (averaged)                                        | Fentanyl or ketorolac used as rescue analgesia                             |
| Comfort and colleagues <sup>17</sup>  | Yes                               | VAS at 1 and 2 h                                            | Amount of paracetamol, codeine, pethidine or morphine determined by nurse  |
| Gillberg and colleagues <sup>33</sup> | Yes                               | 10 cm visual analogue scale (VAS)                           | Pethidine or paracetamol given by nurse                                    |
| Hovorka and colleagues <sup>39</sup>  | Yes                               | Three-point rating scale assessment by observer             | Paracetamol or fentanyl given on observer's judgement of pain              |
| Liu and colleagues <sup>56</sup>      | Yes                               | VAS at 30, 60 90 min postop.                                | Standard protocol of different analgesics                                  |
| Van Ee and colleagues <sup>93</sup>   | Yes                               | 0–10 numerical rating scale                                 | Paracetamol/naproxen provided on patient request                           |
| Green and colleagues <sup>37</sup>    | Yes                               | 10 cm visual analogue scale (VAS)                           | Incremental i.v. doses of fentanyl 25 µg                                   |
| Wilson and colleagues <sup>95</sup>   | Yes                               | 10 cm visual analogue scale (VAS)                           | Morphine 10–15 mg prn                                                      |
| Dunn and colleagues <sup>28</sup>     | Yes                               | Five-point verbal rating scale in recovery and at 2 and 4 h | Mefenamic acid and/or diamorphine on nurse's judgement                     |

demand or nurses' perceptions of pain, even before pain severity is scored, the same objections apply also to those studies in which a significant analgesic effect for NSAID was found (table 4).

#### NSAID AND SHOULDER PAIN

If the pain perceived in the tips of the shoulders is related to inflammation of the peritoneal reflections supplied by the phrenic nerve, this may also be reduced by anti-inflammatory analgesics.

Although Crocker and Paech<sup>19</sup> found that global pain after laparoscopy and mean requirements for pethidine were less after indomethacin than after placebo ( $P=0.09$  or  $0.07$ ), shoulder and chest pain was higher in the indomethacin group. Van Ee, Memrika and Van der Linden<sup>93</sup> gave naproxen 500 mg or dummy suppository 1 h before laparoscopy. The control group required more additional analgesics and had higher pain scores than the naproxen group, but the incidence of shoulder tip pain was not different in the two groups. Edwards and colleagues<sup>29</sup> studied women who had undergone either diagnostic laparoscopy or laparoscopic tubal ligation. In each group, patients were given diclofenac 75 mg after induction or no injection. Shoulder pain was noted separately but analgesia was given for total pain. The laparoscopic sterilization group had, on average, significantly more pain than the diagnostic laparoscopy group. Pain scores were lower in the diclofenac group on each assessment but the differences were not significant.

#### TIMING

The timing of NSAID administration and onset has been reviewed by Moote.<sup>69</sup> There is clearly a latency in onset of analgesic action and a longer delay before peak action. Rosenblum and co-workers<sup>79</sup> showed that the analgesic effect of ibuprofen was apparent only after the patient had left the recovery room. Davie, Slawson and Burt<sup>22</sup> gave oral fenoprofen 200 mg and saline injection when patients complained of pain in a double-blind, double dummy, placebo-controlled study. The assessment was an interview and a 10-cm linear analogue scale. Although those who received fenoprofen had less pain than those who received placebo after 1 h, the difference was not significant until 2 h. Van Ee, Memrika and Van der Linden<sup>93</sup> found naproxen to be more effective than placebo only 30 min after operation, or approximately 2 h after administration of the naproxen suppository.

In the studies which failed to demonstrate a significant analgesic effect of NSAID, the drug was usually given at or after induction of anaesthesia, that is approximately 30 min before rescue analgesia was available for pain in the recovery room, except where indomethacin was administered rectally 1 or 2 h before operation.<sup>19,63</sup> In those in which more than one assessment of pain or analgesic consumption was made, the greatest difference between NSAID and placebo effect was found at 2.5, 4 or 5 h after i.v. or i.m. administration. Similarly, in those studies in which NSAID demonstrated a significant

analgesic effect, the greatest effect was found between 2 and 24 h after administration. Dunn, Clark and Jones,<sup>28</sup> using a relatively large dose of the long-acting agent naproxen did not find variation in analgesia with time over the first 24 h.

After oral absorption, there is a delay to peak plasma concentrations of most NSAID of approximately 1–2 h.<sup>89</sup> There may be further delay before peak concentrations at the site of action are reached. For example, regional concentrations of prostanoids within the fallopian tube suggest that surface generation may be less than in the lamina propria, for example. The data sheet for ketorolac (1996–1997) states that "the time to onset of analgesia effect after both intravenous and intramuscular administration is similar and is approximately 30 minutes with maximum analgesia occurring within one to two hours". (The evidence for this statement is difficult to trace in any single study, either by literature search or by direct enquiry to the information service at Syntex (Roche).) Similar data for the peak analgesic effect of i.v. diclofenac are not readily available but the same delay would be expected.<sup>44</sup> Pain assessment and analgesic administration may be occurring before NSAID become effective. It might be argued that NSAID were delayed in onset because they had no effect against prostanoids already synthesized.<sup>69</sup>

Another mechanism may be operative. It is possible that accumulation of the "right-handed" stereoisomer (R enantiomer) may be responsible for the build-up of analgesic effect. The S enantiomer of most (if not all) NSAID shows more anti-inflammatory activity than the R enantiomer, yet the analgesic activity of flurbiprofen for example, is related to both the R and S enantiomers, and prostaglandin inhibition within the brain is significantly inhibited by the pure R enantiomer.<sup>9</sup> Although many NSAID show one-way conversion of R to S enantiomer, via acetyl co-enzyme A for example, this is not universal or (with the exception of ibuprofen) extensive. One-way conversion does not occur with ketorolac in humans<sup>67</sup> but the R form has a half-life approximately twice that of the S form and would accumulate with repeated doses and dominate with time.

NSAID might provide pre-emptive analgesia. A noxious stimulus causes spinal and supraspinal processing, such as "wind-up" at the NMDA channel in the spinal dorsal horn, thereby increasing the throughput of the second-order spinal pain transmission neurones from a given input from the nociceptor through the first-order C fibre nociceptive afferent. If effective analgesia is present before the nociceptive stimulus, there is less wind-up and the total pain experience and total amount of analgesia required is less.<sup>97</sup> However, the pain of the early postoperative period, either by moderate or strong nociceptive stimuli or by mechanical, thermal or noxious stimuli in the presence of inflammation and hyperalgesia, can also cause wind-up.<sup>49</sup> Comparison of the effect of diclofenac given before laparoscopy with that diclofenac given after did not show any difference in pain or analgesic requirements in the postoperative period.<sup>10</sup> Although allowance was

made for the time required for diclofenac to exert its analgesic effect, it did not take into account the nocigenic stimuli in the early postoperative period.

#### ELIMINATION OF BIAS

In 1983, Dunn and colleagues<sup>27</sup> compared premedication with zomepirac 100 mg, an obsolete NSAID, with codeine 8 mg for prevention of pain after dental extraction and laparoscopy. The assessments of the procedures were considered separately. The study was prospective, randomized, double-blind and double-dummy, and assessments were a 10-cm vertical linear analogue scale and a five-point verbal rating scale. Systemic and local analgesics, with the exception of nitrous oxide, were not used in the general anaesthetic technique. Rescue analgesia was available. Analysis of those who required rescue medication was separated from those who did not. At 5 h after operation, all but one patient in the codeine group had received additional analgesia. Pain scores and rates of re-medication in each group were similar and only by 4 h was there a moderate, but not significant, difference in favour of zomepirac. (Pain scores and rates of re-medication in dental patients suggested that zomepirac was significantly more effective.) The study was not subjected to analysis to estimate the likelihood of demonstrating a difference between the two treatment groups but, in other respects, it achieved a higher standard of objectivity than most that followed. The subsequent study of Brodie and Casper,<sup>8</sup> which has been cited and discussed by almost half of the reports of the randomized studies that followed, was not double-blind (the treatment being dependent on the last digit of the hospital number), nor was pain assessment objective.

Only before the studies of Dunn, Clark and Jones<sup>28</sup> and MacLennan and co-workers<sup>63</sup> was the sample size calculated to achieve an 80% probability of detecting a material difference between the two groups of pain scores or between the numbers requiring analgesia. However, the numbers of patients in the studies which showed NSAID to be superior to placebo were not materially greater than those in studies which failed to show a significant effect.

There are many other studies and reviews or audits of the efficacy of analgesics for pain after laparoscopy, but only randomized controlled studies are included here.

#### ASSESSMENT OF OUTCOMES (SEE ALSO TABLE 4)

Almost all studies described have used patients' assessments of pain, either with a linear analogue scale, some other form of visual analogue scale, numerical rating scale or with a verbal rating scale. Verbal rating scales show a high level of correlation with linear analogue scores.<sup>51</sup> Occasionally, pain scores were treated not as ordinal data but subjected to parametric analysis and averages compared.<sup>24</sup> This may be defensible.<sup>51</sup> Prados and Blaylock<sup>76</sup> used fentanyl by patient-controlled administration to determine analgesic requirements after outpatient

gynaecological surgery which required intubation and ventilation. Unfortunately, the report does not state that all were laparoscopies. However, in one study<sup>8</sup> the method of pain scoring was left to a nurse in recovery and the investigators were not blinded. In another,<sup>63</sup> a large, randomized, double-blind, double-dummy study, with pre-study power analysis, no assessment of pain was made by the patient and two types of rescue analgesia were administered according to patient demand and staff discretion. The study was unable to show any differences between the pain of tubal occlusion by clips and that with rings, as demonstrated by others<sup>14 26</sup>

#### REVIEW OF REVIEWS

There have been many reviews of NSAID in general, and individually, with regard to their pharmacology, uses and efficacy; few have considered their place in postoperative pain after laparoscopy<sup>16 47 69</sup> and even fewer have adequately considered analgesic requirements in reviews of laparoscopy.<sup>81</sup> The former have described the divergence of opinion of efficacy in comparison with either placebo or with other analgesics. They have commended for consideration the concept of balanced analgesia although there is little evidence for potentiation of quantity or quality of analgesia after laparoscopy and there is evidence of the disadvantage of a greater range of unwanted side effects. Only Schoeffler, Diemunsch and Fourgeaud<sup>81</sup> considered the different types of pain, different mechanisms and some of the various stratagems for overcoming them.

#### THE PLACE OF NSAID FOR POST-LAPAROSCOPY PAIN

That NSAID are most appropriate for pain after laparoscopy has not been proved. Even the additional pain caused by tubal ligation, possibly mediated by prostaglandins, does not appear to be ideally treated by prostaglandin synthase inhibitors. In one study, pain was relieved better after diagnostic laparoscopy and in another after tubal ligation. Does reduction in opioid use have a clinical advantage? Except in rare cases the need for opioids, especially when given judiciously and frequently, is unlikely to compromise ventilation. The reduced need for opioids is often postulated to reduce nausea and vomiting, ileus and time to readiness for discharge. Yet, usually no difference is found in the times of recovery to the various stages of autonomous function. Nausea and vomiting accompany the pain of both tubal occlusion and dysmenorrhoea<sup>40</sup> and may be unrelated to the use of opioids. Conversely, the antiemetic advantage of propofol for day-case anaesthesia is reduced or lost when papaveretum or morphine is used.<sup>59 66 68</sup> It would seem necessary to administer NSAID 1 h or more before laparoscopy to gain the maximum benefit after operation. At this stage, the accentuated risks of refractory bleeding, hypovolaemia or renal failure are not yet apparent. Bleeding is more difficult to detect and control during laparoscopy than laparotomy. Some studies and other reviews<sup>16</sup> have suggested that the quality of analgesia and patient

satisfaction is improved if both NSAID and opioids are used. However, Davie and Gordon<sup>21</sup> have shown that fenoprofen and paracetamol used alone in modest doses were not significantly more effective than placebo, but in combination were significantly superior. This combination would appear to be more suitable for day surgery than the addition of opioids. Despite all the above, it is possible that the measures of pain, usually at rest rather than on movement, and well-being, are too insensitive and that the clinical impression of the nursing staff, based on the summation of many visual and verbal stimuli, should be quantified and tested. It is equally possible that the perception of pain relief by NSAID is an extrapolation from operative models in which NSAID have a more noticeable effect.

## Conclusion

Pain which is caused by laparoscopy and laparoscopic surgery is variable in duration, severity and character. The tendency towards reduced hospital stay for laparoscopic procedures leads to failure of recognition and treatment of pain which arises or increases after the first few postoperative hours. Pain which is severe after hospital discharge makes necessary high-cost domiciliary visits and possibly inadequate treatment because of the constraints of the lack of monitoring.

Local anaesthetic techniques, regional or focal, appear more successful for pelvic laparoscopy than for laparoscopic cholecystectomy for example, although interpleural anaesthesia may be effective and safe for unilateral pain. Pain related to stimulation of the phrenic nerve is not easily resolved by extradural anaesthesia without considerable risk or life support.

Non-steroidal anti-inflammatory drugs and paracetamol are not as effective for immediate postoperative pain as are opioids and appear to be ineffective for pain in the shoulders. Their effect in the majority of patients is to reduce the severity of pain or to reduce the need for opioid analgesia. As a sole analgesic, they appear inadequate in most patients. The evidence that the use of NSAID increases recovery or hospital discharge is not consistent. Single intraoperative doses of short-acting opioids such as fentanyl are also inadequate for pain in most cases. However, in many patients, NSAID, given sufficiently early to be effective by the time of waning of the effect of the preoperative opioid, are sufficient to render discomfort tolerable.

Until the various pains are assessed separately and analgesic stratagems are assessed for the different components of the pain experienced, most of these pain-relieving methods will be ineffective because the remaining pain is a sufficient cause of dissatisfaction to maintain demands for rescue analgesia and to increase pain scores. A combination of simple measures, such as evacuating the insufflated gas, application of local anaesthetic gel to the fallopian tubes at the time of clipping, use of a rectus sheath block or local anaesthetic applied to skin and muscle wounds, preoperative use of paracetamol and use of a moderately short-acting intraoperative opioid may

reduce the immediate and referred pain effectively and safely. The later inflammatory pain can then be modified with non-opioid drugs such as the anti-inflammatory agents.

## References

- Alexander CD, Wetchler BV, Thompson RE. Bupivacaine infiltration of the mesosalpinx in ambulatory surgical laparoscopic tubal sterilization. *Canadian Journal of Anaesthesia* 1987; **34**: 362–365.
- Alexander JI, Hull MGR. Abdominal pain after laparoscopy: the value of a gas drain. *British Journal of Obstetrics and Gynaecology* 1987; **94**: 267–269.
- Aho MS, Erkola OA, Scheinin H, Lehtinen A-M, Korttila KT. Effect of intravenously administered dexmedetomidine on pain after laparoscopic tubal ligation. *Anesthesia and Analgesia* 1991; **73**: 112–118.
- Anaokar SM, Parulekar SV, Thatte UM, Dahanukar SA. A multiple dose comparison of ketorolac tromethamine with ibuprofen for analgesic activity. *Journal of Postgraduate Medicine* 1993; **39**: 74–76.
- Bannwarth B, Netter P, Lapicque F, Gillet P, Péré P, Boccard E, Royer RJ, Gaucher A. Plasma and cerebrospinal fluid concentrations of paracetamol after a single intravenous dose of propacetamol. *British Journal of Clinical Pharmacology* 1992; **34**: 79–81.
- Barclay K, Calvert JP, Catling SJ, Edwards ND, Rees A. Analgesia after laparoscopic sterilisation: effect of 2% lignocaine applied to Filshie clips. *Anaesthesia* 1994; **49**: 68–70.
- Barkun JS, Barkun AN, Sampalis JS, Fried G, Taylor B, Wexler MJ, Goresky CA, Meakins JL. Randomised controlled trial of laparoscopic versus mini cholecystectomy: a national survey of 4292 hospitals and an analysis of 77604 cases. *Lancet* 1992; **340**: 1116–1119.
- Brodie BL, Casper RF. Prostaglandins mediate postoperative pain in Falope ring sterilization. *American Journal of Obstetrics and Gynecology* 1985; **151**: 175–177.
- Brune K, Menzel-Soglowek S, Zeilhofer HU. Differential analgesic effects of aspirin-like drugs. *Drugs* 1992; **44** (Suppl. 5): 52–59.
- Buggy DJ, Wall C, Carton EG. Preoperative or postoperative diclofenac for laparoscopic tubal ligation. *British Journal of Anaesthesia* 1994; **73**: 767–770.
- Cade L, Kakulas P. Ketorolac or pethidine for analgesia after elective laparoscopic sterilization. *Anaesthesia and Intensive Care* 1995; **23**: 158–161.
- Cataldo PA, Senagore AJ, Kilbride MJ. Ketorolac and patient-controlled analgesia in the treatment of postoperative pain. *Surgery, Gynecology and Obstetrics* 1993; **176**: 435–438.
- Chan WY, Dawood MY, Fuchs F. Relief of dysmenorrhoea with the prostaglandin synthetase inhibitor ibuprofen: effect on prostaglandin levels in menstrual fluid. *American Journal of Obstetrics and Gynecology* 1979; **135**: 102–108.
- Chi I-C, Cole LP. Incidence of pain among women undergoing laparoscopic sterilization by electrocoagulation, the spring-loaded clip, and the tubal ring. *American Journal of Obstetrics and Gynecology* 1979; **137**: 397–401.
- Chundrigar T, Morris R, Hedges AR, Stamatakis JD. Intraperitoneal bupivacaine for effective pain relief after laparoscopic cholecystectomy. *Annals of the Royal College of Surgeons of England* 1993; **75**: 437–439.
- Code W. NSAIDs and balanced analgesia. *Canadian Journal of Anaesthesia* 1993; **40**: 401–405.
- Comfort VK, Code WE, Rooney ME, Yip RW. Naproxen premedication reduces postoperative tubal ligation pain. *Canadian Journal of Anaesthesia* 1992; **39**: 349–352.
- Comyn DJ. Minimising pain after laparoscopy. *Abstracts of the 9th World Congress of Anaesthesiologists* 1988; A0004.
- Crocker S, Paech M. Preoperative rectal indomethacin for analgesia after laparoscopic sterilisation. *Anaesthesia and Intensive Care* 1992; **20**: 337–340.
- Dahl JB, Kehlet H. Non-steroidal anti-inflammatory drugs: rationale for use in postoperative pain. *British Journal of Anaesthesia* 1991; **66**: 703–712.
- Davie IT, Gordon NH. Comparative assessment of fenoprofen and paracetamol given in combination for pain after surgery. *British Journal of Anaesthesia* 1978; **50**: 931–935.



22. Davie IT, Slawson KB, Burt RA. A double-blind comparison of parenteral morphine, placebo, and oral fentanyl in management of postoperative pain. *Anesthesia and Analgesia* 1982; **65**: 1002–1005.
23. Davis A, Millar JM. Postoperative pain: a comparison of laparoscopic sterilisation and diagnostic laparoscopy. *Anaesthesia* 1988; **43**: 796–797.
24. DeLucia JA, White PF. Effect of intraoperative ketorolac on recovery after outpatient laparoscopy. *Anesthesiology* 1991; **75**: A13.
25. Ding Y, White PF. Comparative effects of ketorolac, dezocine and fentanyl as adjuvants during outpatient anesthesia. *Anesthesia and Analgesia* 1992; **75**: 566–571.
26. Dobbs FF, Kumar V, Alexander JI, Hull MGR. Pain after laparoscopy related to posture and ring versus clip sterilization. *British Journal of Obstetrics and Gynaecology* 1987; **94**: 262–266.
27. Dunn GL, Morison DH, Fargas-Babjak AM, Goldsmith CH. Comparison of zomepirac and codeine as analgesic premedicants in short-stay surgery. *Anesthesiology* 1983; **58**: 265–269.
28. Dunn TJ, Clark VA, Jones G. Preoperative oral naproxen for pain relief after day-case laparoscopic sterilization. *British Journal of Anaesthesia* 1995; **75**: 12–14.
29. Edwards ND, Barclay K, Catling SJ, Martin DG, Morgan RH. Day case laparoscopy: a survey of postoperative pain and an assessment of the value of diclofenac. *Anaesthesia* 1991; **46**: 1077–1080.
30. Fredman B, Jedeikin R, Olsfanger D, Flor P, Gruzman A. Residual pneumoperitoneum: a cause of postoperative pain after laparoscopic cholecystectomy. *Anesthesia and Analgesia* 1994; **79**: 152–154.
31. Fromont G, Leroy J. Laparoskopischer Leistenhernienverschluss durch subperitoneale Prosteseinlage (Operation nach Stoppa). *Chirurg* 1993; **64**: 338–340.
32. Fullarton GM, Darling K, Williams J, MacMillan R, Bell G. Evaluation of the cost of laparoscopic and open cholecystectomy. *British Journal of Surgery* 1994; **81**: 124–126.
33. Gillberg LE, Harsten AS, Stahl LB. Preoperative diclofenac sodium reduces postlaparoscopy pain. *Canadian Journal of Anaesthesia* 1993; **40**: 406–408.
34. Goegler S, Blobner M, Busley R, Felber AR, Jelen-Esselbom S. Subphrenic catheter for postoperative analgesia after laparoscopic cholecystectomy. *Anesthesiology* 1993; **79**: A26.
35. Grace D, Milligan KR, Loughran PG, McCaughey W. Diclofenac sodium versus fentanyl for analgesia in laparoscopic sterilization. *Acta Anaesthesiologica Scandinavica* 1994; **38**: 342–345.
36. Green CR, Pandit SK, Kothary SP, Levy L, Mathai MK. No fentanyl sparing effect of intraoperative IV ketorolac after laparoscopic tubal ligation. *Anesthesiology* 1992; **77**: A7.
37. Green CR, Pandit SK, Kothary SP, Schork MA, Tait AR. A combination of intraoperative fentanyl and ketorolac during diagnostic laparoscopy has a narcotic sparing effect in the recovery room. *Anesthesiology* 1993; **79**: A43.
38. Helvacioglu A, Weis R. Operative laparoscopy and postoperative pain relief. *Fertility and Sterility* 1992; **57**: 548–552.
39. Hovorka J, Kallela H, Kottilla K. Effect of intravenous diclofenac on pain and recovery profile after day-case laparoscopy. *European Journal of Anaesthesiology* 1993; **10**: 105–108.
40. Huang KC, Wolfe WM, Tsueda K, Simpson PM, Caissie KF. Effects of meclofenamate and acetaminophen on abdominal pain following tubal occlusion. *American Journal of Obstetrics and Gynecology* 1986; **155**: 624–629.
41. Hunter JG, Staheli J, Oddsdotir M, Trus T. Nitrous oxide pneumoperitoneum revisited. Is there a risk of combustion? *Surgical Endoscopy* 1995; **9**: 501–504.
42. Jackson SA, Laurence AS, Hill JC. Does post-laparoscopy pain related to residual carbon dioxide? *Anaesthesia* 1996; **51**: 485–487.
43. Jensen AG, Prevderos H, Kullman E, Andergerg B, Lennmarken C. Perioperative nitrous oxide does not influence recovery after laparoscopic cholecystectomy. *Acta Anaesthesiologica Scandinavica* 1993; **37**: 683–686.
44. John VA. The pharmacokinetics and metabolism of diclofenac (Voltarol) in animals and man. *Rheumatology and Rehabilitation* 1978; **2** (Suppl.): 22–37.
45. Joris J, Cigarini I, Legrand M, Jacquet N, De Groote D, Franchimont P, Lamy M. Metabolic and respiratory changes after cholecystectomy performed via laparotomy or laparoscopy. *British Journal of Anaesthesia* 1992; **69**: 341–345.
46. Joris J, Thiry E, Paris P, Weerts J, Lamy M. Pain after laparoscopic cholecystectomy: characteristics and effect of intraperitoneal bupivacaine. *Anesthesia and Analgesia* 1995; **81**: 379–384.
47. Joshi GP. Postoperative pain management. *International Anesthesiology Clinics* 1994; **32**: 113–126.
48. Kaplan P, Freund R, Squires J, Herz M. Control of immediate postoperative pain with topical bupivacaine hydrochloride for laparoscopic Falope ring tubal ligation. *Obstetrics and Gynecology* 1990; **76**: 798–802.
49. Kissin I. Preemptive analgesia: why its effect is not always obvious. *Anesthesiology* 1996; **84**: 1015–1019.
50. Kum CK, Wong CW, Goh PMY, Ti TK. Comparative study of pain level and analgesic requirement after laparoscopic and open cholecystectomy. *Surgical Laparoscopy and Endoscopy* 1994; **4**: 139–141.
51. Kunst G, Chrusasik S, Black AMS, Chrusasik J, Schulte-Mönting J, Alexander JI. Patient-controlled epidural diamorphine for postoperative pain: verbal rating and visual analogue assessments of pain. *European Journal of Anaesthesiology* 1996; **13**: 117–129.
52. Larsen K-E, Jensen HK. Laparoscopic sterilization with the Falope ring. *Acta Obstetrica et Gynecologica Scandinavica* 1983; **62**: 125–130.
53. Lawson S, Cole RA, Templeton AA. The effect of laparoscopic sterilisation by diathermy or silastic bands on postoperative pain, menstrual symptoms and sexuality. *British Journal of Obstetrics and Gynaecology* 1979; **86**: 659–663.
54. Leggat IT, Barr W. Post-operative analgesia following laparoscopic sterilisation. *Scottish Medical Journal* 1979; **24**: 220.
55. Lipscomb GH, Stovall TG, Summitt RL, Ling FW. The effect of nitrous oxide and carbon dioxide pneumoperitoneum on postlaparoscopy tubal ligation pain. *Journal of Gynecologic Surgery* 1993; **9**: 175–178.
56. Liu J, Ding Y, White PF, Feinstein R, Shear JM. Effects of ketorolac on postoperative analgesia and ventilatory function after laparoscopic cholecystectomy. *Anesthesia and Analgesia* 1993; **76**: 1061–1066.
57. Loughney AD, Sarma V, Ryall EA. Intraperitoneal bupivacaine for the relief of pain following day case laparoscopy. *British Journal of Obstetrics and Gynaecology* 1994; **101**: 449–451.
58. Lysak SZ, Anderson PT, Carithers RA, Devane GC, Smith ML, Bates GW. Postoperative effects of fentanyl, ketorolac and piroxicam as analgesics for outpatient laparoscopic procedures. *Obstetrics and Gynecology* 1994; **83**: 270–275.
59. McCollum JSC, Milligan KR, Dundee JW. The antiemetic effect of propofol. *Anaesthesia* 1988; **43**: 239–240.
60. McKenzie R. Postoperative pain after laparoscopic sterilisation. *Anaesthesia* 1989; **44**: 450.
61. McKenzie R, Phitayakorn P, Uy NTL, Chalasana J, Melnick BM, Kennedy RL, Vicinie AF. Topical bupivacaine and etidocaine analgesia following fallopian tube banding. *Canadian Journal of Anaesthesia* 1989; **36**: 510–514.
62. McKenzie R, Phitayakorn P, Uy NTL, Tantisera B, Wadhwa RK, Vicinie AF. Topical etidocaine during laparoscopic tubal occlusion for postoperative pain relief. *Obstetrics and Gynecology* 1986; **67**: 447–449.
63. MacLennan AH, Rodrigues LV, Krutli DR, Klomp A. Postoperative discomfort after ring or clip tubal ligation—is there any difference and do indomethacin suppositories help? *Contraception* 1990; **42**: 309–313.
64. McMahon AJ, Russell IT, Baxter JN, Ross S, Anderson JR, Morran CG, Sunderland G, Galloway D, Ramsay G, O'Dwyer PJ. Laparoscopic versus minilaparotomy cholecystectomy: a randomised trial. *Lancet* 1994; **343**: 135–138.
65. McMahon AJ, Russell IT, Ramsay G, Sunderland G, Baxter JN, Anderson JR, Galloway D, O'Dwyer PJ. Laparoscopic and minilaparotomy cholecystectomy: a randomised trial comparing postoperative pain and pulmonary function. *Surgery* 1994; **115**: 533–539.
66. Marshall CA, Jones RM, Bajorek PK, Cashman JN. Recovery characteristics using isoflurane or propofol for maintenance of anaesthesia: a double blind controlled trial. *Anaesthesia* 1992; **47**: 461–466.

67. Mather LE. Do the pharmacodynamics of the non-steroidal anti-inflammatory drugs suggest a role in the management of postoperative pain? *Drugs* 1992; **44** (Suppl. 5): 1–13.
68. Millar JM. Analgesia for day-case laparoscopy. *Anaesthesia* 1993; **48**: 168.
69. Moote C. Efficacy of non-steroidal anti-inflammatory drugs in the management of postoperative pain. *Drugs* 1992; **44** (Suppl. 5): 14–30.
70. Morley-Foster P, Newton PT, Cook M-J. Ketorolac and indomethacin are equally efficacious for the relief of minor postoperative pain. *Canadian Journal of Anaesthesia* 1993; **40**: 1126–1130.
71. Narchi P. Nouvelles voies d'infiltration: injections intrapéritonéales. *Cahiers d'Anesthésiologie* 1995; **43**: 267–272.
72. Narchi P, Benhamou D, Aubrun F, Labaille T, Fernandez H. Analgesia using mesosalpinx infiltration combined with intraperitoneal lidocaine for Yoon ring laparoscopy. *Anesthesiology* 1992; **77**: A17.
73. Narchi P, Benhamou D, Fernandez H. Intraperitoneal local anaesthetic for shoulder pain after day-case laparoscopy. *Lancet* 1991; **338**: 1569–1570.
74. Ogra SO, Kirton KT, Tomasi TB, Lippes J. Prostaglandins in the human fallopian tube. *Fertility and Sterility* 1974; **25**: 250–255.
75. Pelland PC. The application of lidocaine to the fallopian tubes during tubal fulguration by laparoscopy. *Obstetrics and Gynecology* 1976; **47**: 501–502.
76. Prados W, Blaylock S. The effect of ketorolac on the post-operative narcotic requirements of gynecological surgery outpatients. *Anesthesiology* 1991; **75**: A6.
77. Rademaker BMP, Kalkman CJ, Odoom JA, de Wit L, Ringers J. Intraperitoneal local anaesthetics after laparoscopic cholecystectomy: effects on postoperative pain, metabolic responses and lung function. *British Journal of Anaesthesia* 1994; **72**: 263–266.
78. Riedel HH, Semm K. Das postpelviskopische- (laparoscopische) Schmerzsyndrom. *Geburthilfe Frauenheilkunde* 1980; **40**: 635–643.
79. Rosenblum M, Weller RS, Conard P, Falvey EA, Gross JB. Ibuprofen provides longer lasting analgesia than fentanyl after laparoscopic surgery. *Anesthesia and Analgesia* 1991; **73**: 255–259.
80. Scheinin B, Kellokumpu I, Lindgren L, Haglund C, Rosenberg PH. Effect of intraperitoneal bupivacaine on pain after laparoscopic cholecystectomy. *Acta Anaesthesiologica Scandinavica* 1995; **39**: 195–198.
81. Schoeffler P, Diemunsch P, Fourgeaud L. Coelioscopic ambulatoire. *Cahiers d'Anesthésiologie* 1993; **41**: 385–391.
82. Schulte-Steinberg H, Weninger E, Jokisch D, Hofstetter B, Misera A, Lange V, Stein C. Intraperitoneal versus interpleural morphine or bupivacaine for pain after laparoscopic cholecystectomy. *Anesthesiology* 1995; **82**: 634–840.
83. Shapiro MH, Duffy BL. Intramuscular ketorolac for post-operative analgesia following laparoscopic sterilisation. *Anaesthesia and Intensive Care* 1994; **22**: 22–24.
84. Silva PD, Kang SB, Sloane KA. Gamete intrafallopian transfer with spinal anesthesia. *Fertility and Sterility*, 1993; **59**: 841–843.
85. Smith BE, MacPherson GH, de Jonge M, Griffiths JM. Rectus sheath and mesosalpinx block for laparoscopic sterilization. *Anaesthesia* 1991; **46**: 875–877.
86. Smith BE, Suchak M, Siggins D, Challands J. Rectus sheath block for diagnostic laparoscopy. *Anaesthesia* 1988; **43**: 947–948.
87. Spielman FJ, Hulka JF, Ostheimer GW, Mueller RA. Pharmacokinetics and pharmacodynamics of local analgesia for laparoscopic tubal ligations. *American Journal of Obstetrics and Gynecology* 1983; **146**: 821–823.
88. Stiff G, Rhodes M, Kelly A, Telford K, Armstrong CF, Rees BI. Long-term pain: less common after laparoscopic than open cholecystectomy. *British Journal of Surgery* 1994; **81**: 1368–1370.
89. Sunshine A, Olson NZ. Non-narcotic analgesics. In: Wall PD, Melzack R, eds. *Textbook of Pain*. Edinburgh: Churchill Livingstone, 1994.
90. Tate JJ, Chung SCS, Dawson J, Leong HT, Chan A, Lau WY, Li AKC. Conventional versus laparoscopic surgery for acute appendicitis. *British Journal of Surgery* 1993; **80**: 761–764.
91. Tobias JD, Holcomb GW, Lowe S, Hersey S, Brock JW. Caudal epidural block for analgesia following herniorrhaphy with laparoscopy in children. *Journal of Laparoendoscopic Surgery* 1994; **4**: 117–120.
92. Turner GA, Gorringer J. Indomethacin as adjunct analgesia following open cholecystectomy. *Anaesthesia and Intensive Care* 1994; **22**: 25–29.
93. Van Ee R, Memrika DJ, Van der Linden CThM. Pain relief following day-case diagnostic hysteroscopy-laparoscopy for infertility: a double-blind randomised trial with pre-operative naproxen versus placebo. *Obstetrics and Gynecology* 1993; **82**: 951–954.
94. Vastik-Fernandez J, Gimeno MF, Lima F. Spontaneous motility and distribution of prostaglandins in different segments of human fallopian tubes. *American Journal of Obstetrics and Gynecology* 1975; **122**: 663–668.
95. Wilson YG, Rhodes M, Ahmed R, Daugherty M, Cawthorn SJ, Armstrong CP. Intramuscular diclofenac sodium for post-operative analgesia after laparoscopic cholecystectomy: a randomised controlled trial. *Surgical Laparoscopy and Endoscopy* 1994; **4**: 340–344.
96. Windsor A, McDonald P, Mumtaz T, Millar JM. The analgesic efficacy of tenoxicam versus placebo in day case laparoscopy: a randomised parallel double-blind trial. *Anaesthesia* 1996; **51**: 1066–1069.
97. Woolf CJ, Chong MS. Preemptive analgesia—treating post-operative pain by preventing the establishment of central sensitisation. *Anesthesia and Analgesia* 1993; **77**: 362–379.
98. Zahl K, Apfelbaum JL. Muscle pain occurs after outpatient laparoscopy despite the substitution of vecuronium for succinylcholine. *Anesthesiology* 1989; **70**: 408–411.
99. Zucker KA, ed. *Surgical Laparoscopy*. St Louis: Quality Medical Publishing, 1991.
